# Supplementary material for: Conservation and genetic analysis of the endangered Martina Franca donkey using pedigree data
Source: Frontiers journal article supplement (doi:10.3389/fanim.2025.1588467), 2025-06-09
Supplement: Table_4.docx [file Table_4.docx]

**Supplementary S4.** List of scripts used to generate figures and tables included in the manuscript

1. **data_preparation&inbreeding_analysis.R** – For scripts that involve loading, cleaning, and formatting the pedigree data; inbreeding coefficients calculation (FPED1, FPED3) and generation of plots to visualize inbreeding trends over time; analysing the inbreeding coefficients by province and time period. FPED1 utilizes a recursive algorithm for smaller datasets, while FPED3, developed by Meuwissen and Luo (1992), is optimized for larger datasets to capture inbreeding fluctuations across multiple generations.
2. **inbreeding_analysis_segmented_regression.R -** This R script performs an inbreeding analysis on a pedigreed population, using segmented regression to identify breakpoints and trends in the inbreeding coefficient (FPED3) over time. It generates visualizations, calculates segment equations, and compiles the results into a Word report. The script was designed for use with pedigree data and inbreeding coefficients. Segmented regression provides insights into historical genetic events and breeding management strategies that may have impacted genetic diversity (Frankham, 2005).
3. **Family_statistics.R**: This script calculated family statistics, including the number and size of full-sibling families, as well as the number of founders contributing to offspring. The **Effective Number of Founders** (fe) and **Effective Number of Ancestors** (fa) were estimated following the methods outlined by Lacy (1989) and Boichard et al. (1997), providing critical insights into the population's genetic diversity and potential bottlenecks.
4. **generation_interval.R**:The script calculated Generation Intervals for both the total population (TP) and the reference population (RP). These intervals were derived for four paths: sire-son, sire-daughter, dam-son, and dam-daughter. The intervals represent the average time between the birth of offspring and their parents, a key parameter in assessing reproductive management strategies and genetic diversity preservation efforts (Santana et al., 2015).
5. **population_trends.R**: This script generated the visual components for Figure 1, which included: (A) a bar plot showing the animal count by birth year periods and sex, (B) a yearly bar plot from 2006 onward to visualize the distribution of births by sex, and (C) a line plot tracking the female-to-male ratio over time. These plots provide insights into the population dynamics and sex ratio trends, which can influence breeding strategies and genetic diversity conservation efforts (Gutiérrez et al., 2005).
6. **generational_metrics.R:** this script calculated the **Maximum Generations Traced** (MG), **Complete Generations** (CG), and **Equivalent Generations** (EG) from the pedigree data. The histograms of these metrics, segmented by sex, were generated and saved as PNG files. These metrics provide a comprehensive view of pedigree depth, which is crucial for understanding the completeness and reliability of the population's genetic data (Maignel et al., 1996).
7. **pedigree_completeness_plot.R**: This script calculated and plotted the **Pedigree Completeness Levels** (PCL) over **Maximum Generations Traced** (MG) for both the **Ancestor** (ANC) and **Reference** (RP) populations. The term ‘ancestor population’ refers to the total population whereas the term 'reference population' is used to denote the actual living population. The PCL analysis is essential for evaluating the reliability of pedigree data and ensuring sufficient depth in genetic analysis (Maignel et al., 1996).
8. **genetic_diversity.R**: This script calculated various genetic diversity metrics for the Martina Franca donkey population using the purgeR and optiSel packages. It computes inbreeding coefficients and generation numbers using purgeR, focusing on assessing the Effective Population Size (Ne), genetic drift, and bottlenecks. The inbreeding coefficients calculated here (via purgeR) are pedigree-based measures, similar to FPED1 and FPED3, and do not account for the purging of deleterious alleles. The script prepared the pedigree data and calculated metrics like the Effective Number of Founders (fe), Effective Number of Ancestors (fa), and Founder Genome Equivalents (fge) (Lacy, 1989; Boichard et al., 1997). These metrics provide insights into genetic diversity and bottlenecks in both the reference and total populations. The results are compiled into a summary table, which includes Ne and other diversity metrics, and exported to a Word document for reporting.
